# Supplementary material
Source: publisher site journal article supplement (https://www.dovepress.com/article/604273)
Supplement: Supplementary file 1 [file Supplemental%20Meterails.docx]

**Supplementary Table1** Different Expression Proteins（DEPs） of different groups analysis in plasma data

| **DEPs** | **DR vs T2DM** | | **DME vs T2DM** | | **DME vs DR** | | **DR&DME vs T2DM** | |
| --- | --- | --- | --- | --- | --- | --- | --- | --- |
| **Upregulated** | CCL19 IL4 STAMBP IL5 MMP-10 SIRT2 4E-BP1 CD40 NRTN CASP-8 CXCL10  IL17A | OPG CCL28 CD5 CCL4 IL6 TSLP β-NGF GDNF IL20 MCP-1 | CCL19 TSLP IL4 IL7 IL24 CD40 IL33 IL10 SIRT2 CD8A GDNF | STAMBP 4E-BP1 IL-1α FGF-23 CXCL10 IL13 CCL25 | IL7 TWEAK ADA IL1α LIF-R IL10 CD8A LIF IL18 MMP-1 Flt3L IL24 IL33 uPA | IL15RA  FGF-5 TSLP  IL22 RA1 TNFB IL13 IL2RB TRAIL CXCL9 CCL25 SCF IL18R1 IFN-γ CSF-1 | CCL19 IL4 TSLP CD40 SIRT2  STAMBP 4E-BP1 IL24 CXCL10 MMP-10 | IL7 GDNF NRTN IL33 OPG FGF-23 |
| **Downregulated** | OSM uPA MCP-4 CXCL6 TNFSF14 MMP-1 CXCL1 TWEAK LIF-R MCP-2 LIF IL-15RA DNER EN-RAGE CCL23 IL8 LAP TGF-β-1 Flt3L IL18 IFN-γ | FGF-21 FGF-5 TNFB TRANCE ADA CXCL9 FGF-19 TGF-α IL10 CCL20 IL17C TRAIL IL-1α CD244 IL10RB HGF ST1A1 ARTN | MCP-4 CXCL6 TNFSF14 OSM CXCL1 uPA EN-RAGE CCL3 IL8 DNER MCP-2 MCP-3 CCL23 IL20 MMP-1 TRANCE IL5 MCP-1 CD6 IL10RB CST5 LAP | TGF-β-1 FGF-21 NT-3 TWEAK β-NGF IL2 FGF-19 HGF CCL20 CD244 ST1A1 AXIN1 IFN-γ | CXCL6 CXCL1 IL5 MCP-3 MCP-4 CCL3 MCP-1 TNFSF14 β-NGF IL20 EN-RAGE CASP-8 IL8 CST5 DNER IL2 IL17A CCL4 NRTN CD5 CCL23 AXIN1 STAMBP | CCL28 CD6 NT-3 MMP-10 CDCP1 MCP-2 TNFRSF9 TRANCE 4E-BP1 IL6 IL10RA | OSM MCP-4 CXCL6 TNFSF14 CXCL1 uPA MMP-1 EN-RAGE MCP-2 DNER IL8 TWEAK CCL23 CCL3 TRANCE MCP-3 LAP TGF-β-1  FGF-21 IL-10RB IFN-γ | LIF LIF-R FGF-19 CD6 IL15RA HGF CXCL9 Flt3L CCL20 ST1A1 TGF-α IL-20 FGF-5 NT-3 CD244 IL18 |
| **Number of DEPs** | 60 | | 52 | | 62 | | 52 | |

**Supplementary Table2** Different Expression Proteins（DEPs） of different groups analysis in tear data

| **DEPs** | **DR vs T2DM** | **DME vs T2DM** | | **DME vs DR** | | **DR&DME vs T2DM** | |
| --- | --- | --- | --- | --- | --- | --- | --- |
| **Upregulated** | PD-L1 TNFSF14 CXCL11 IL6 CCL19 DNER IL12B IL4 CXCL9 OPG IL15RA ADA CCL4 CCL20 IL18 LIF CST5 CD40 IL22RA1 CD6 SCF TRANCE | IL6 CCL20 DNER AXIN1 LIF-R TNFSF14 IL24 CXCL11 LIF ADA IL17C CCL19 OPG uPA CCL4 CCL3 CXCL10 TNFB MCP-2 CXCL9 MCP-4 PD-L1 SIRT2 CASP-8 ST1A1 IL7 CST5 SCF MMP-10 CCL28 TRAIL Flt3L | CD40 VEGFA FGF-23 IL18 CD6 IL20RA IL8 HGF CXCL5 STAMBP CD5 TWEAK TNF MMP-1 IL10RB CDCP1 TRANCE CX3CL1 CSF-1 CXCL6 IL33 NT-3 IL18R1 OSM TGF-α IL-1α 4E-BP1 CCL23 CCL11 IL15RA | IL6 DNER uPA CCL20 IL17C MCP-4 AXIN1 LIF-R CCL3 IL24 LIF CCL4 SIRT2 CASP-8 TNFB ST1A1 MCP-2 TNFSF14 CXCL10 IL20RA ADA CCL19 TRAIL CCL28 FGF-23 CST5 OPG SCF NT-3 CDCP1 IL10RB IL8 CCL11 HGF | TWEAK  FGF-19  IFN-γ CX3CL1 MMP-10 STAMBP OSM CXCL11 TNFRSF9 CXCL5 IL7 VEGFA Flt3L CD40 CCL23 TGF-α CD5 IL2RB EN-RAGE TSLP MMP-1 CXCL1 IL18R1 MCP-1 CD244 IL33 TNF CXCL9 4E-BP1 CXCL6 CSF-1 CD6 IL18 | TNFSF14 CXCL11 CCL19 PD-L1 OPG CXCL9 DNER IL6 ADA CCL4 LIF CCL20 LIF-R CST5 uPA CCL3 AXIN1 IL17C IL18 SCF MCP-4 CD40 IL24 IL7 Flt3L CD6 IL15RA MMP-10 VEGFA TNF MCP-2 TRAIL | CXCL10 TRANCE IL8 CXCL5 FGF-23 MMP-1 SIRT2 ST1A1 CD5 CSF-1 STAMBP IL-1α CASP-8 TNFB CXCL6 |
| **Downregulated** | TNFRSF9 TSLP IL2 NT-3 IL13 IL2RB SLAMF1 IFN-γ IL20 IL17A TNFB FGF-19 CD244 CASP-8 IL5 CCL23 CCL11 CCL28 | IL12B IL20 SLAMF1 IL5 IL17A Beta-NGF TSLP IL2 CCL25 IL13 TNFRSF9 CD8A MCP-3 IL10RA FGF-21 |  | IL12B IL4 β-NGF SLAMF1 IL5 IL17A IL15RA IL22 RA1 ARTN CCL25 MCP-3 IL20 |  | TSLP TNFRSF9 IL2 IL20 SLAMF1 IL13 IL17A IL5 β-NGF IL2RB CCL25 CD8A |  |
| **Number of DEPs** | 40 | 77 | | 79 | | 59 | |

**
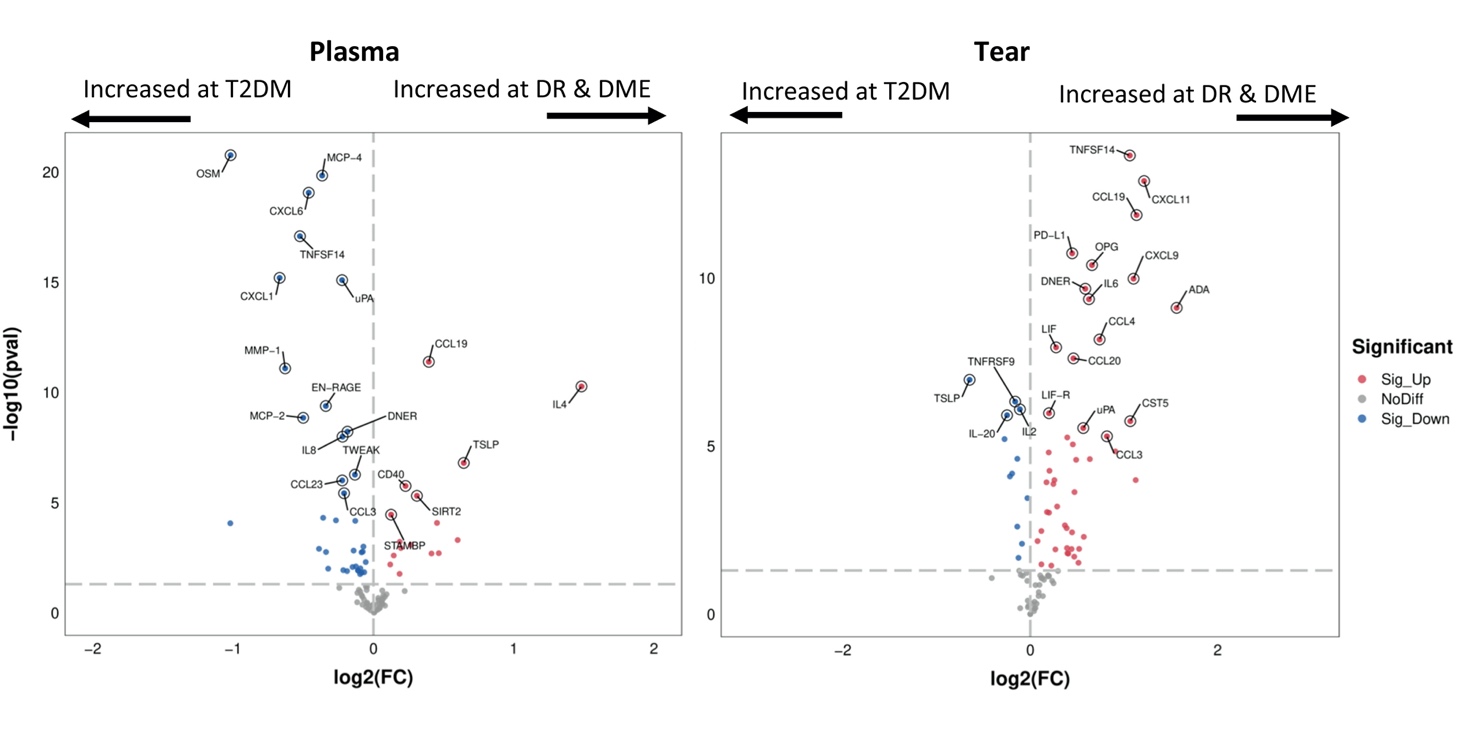
**

**Supplementary Figure 1** Volcano plot of the DEPs compared between the DR & DME groups and the T2DM group.
